# Supplementary material
Source: ML conference proceedings conference paper supplement (https://proceedings.mlr.press/v164/batra22a.html)
Supplement: Supplementary file 3 [file batra22a-supp.zip]

Archive with 4 entries (4 files):
- __MACOSX/._code.zip
- __MACOSX/._phys_dep_final_video_v6.mp4
- __MACOSX/._supplementary.pdf
- supplementary.pdf
